# Supplementary material for: Protein structure prediction in the era of AI: Challenges and limitations when applying to in silico force spectroscopy
Source: PubMed Central journal article supplement (PMC9580946; doi:10.3389/fbinf.2022.983306), 2022-10-07
Supplement: DataSheet1.pdf [file DataSheet1.pdf]

*Supplementary Material for:*

**Protein structure prediction in the era of AI: challenges and limitations when applying to *in silico* force spectroscopy**

Priscila S. F. C. Gomes<sup>1</sup>, Diego E. B. Gomes<sup>1</sup>, Rafael C. Bernardi<sup>1\*</sup>

<sup>1</sup>Department of Physics, College of Sciences and Mathematics, Auburn University, Auburn, AL, 36849

\* **Correspondence:**  
rcbernardi@auburn.edu

**1 Supplementary figures**

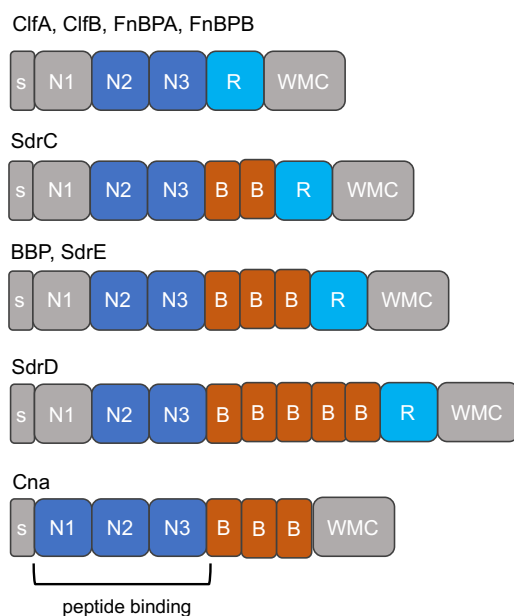

**Supplementary Figure 1.** *S. aureus* adhesin domain organization for clumping factor A (ClfA), Clumping factor B (ClfB), Fibronectin binding protein A (FnBPA), Fibronectin binding protein B (FnBPB), Serine-aspartate repeat protein C (SdrC), Serine-aspartate repeat protein D (SdrD), Serine-aspartate repeat protein E (SdrE), Bone sialoprotein binding protein (BBP) and Collagen binding adhesin (Cna). S, signal peptide; N-ter domains N1 to N3; B, homologous repeats; R, serine-aspartate or fibronectin binding repeats; W, wall-spanning region; M, membrane anchor; C, cytoplasmic tail. The ligand binding region is formed in a cleft between the N2 and N3 domains. Regions colored in gray had no defined structure predicted by AlphaFold 2. Peptide binding domain normally involves a gap between N2 and N3 regions, with exception of Cna, where it is located between N1 and N2 regions.

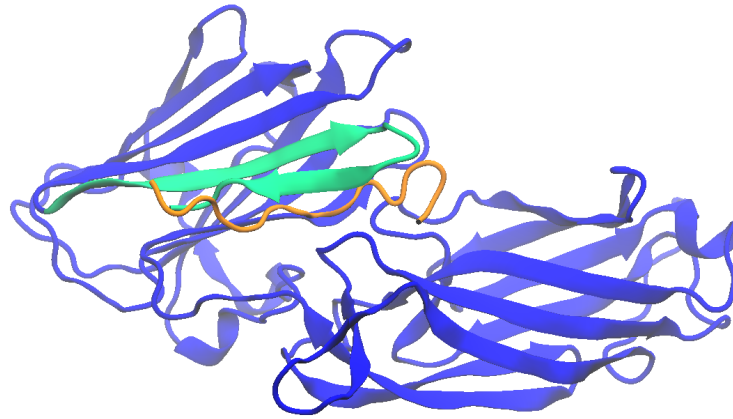

**Supplementary Figure 2:** AlphaFold Multimer model for SdrC (*S. aureus* strain Newman), colored in blue, complexed with fibrinopeptide alpha ( $Fg\alpha$ ), colored in orange. The locking strand is highlighted in green. We notice its different conformation from what is expected for the “dock, lock and latch” mechanism as illustrated in Figure 2A.

## 2 Supplementary Tables

Table S1: *S. aureus* adhesins modelled by AlphaFold 2. Full-length sequences were obtained from Uniprot according to the described entries. Predictions for N2/N3 are described by a “yes” and the number of modelled homologous B domains are also described.

| Uniprot ID | Name                              | Organism                                                 | Length | N2/N3 | B |
|------------|-----------------------------------|----------------------------------------------------------|--------|-------|---|
| Q6GJA6     | Bone sialoprotein-binding protein | <i>Staphylococcus aureus</i> (strain MRSA252)            | 1137   | y     | 3 |
| Q53653     | Clumping factor A                 | <i>Staphylococcus aureus</i> (strain Newman)             | 933    | y     | 0 |
| Q5HHM8     | Clumping factor A                 | <i>Staphylococcus aureus</i> (strain COL)                | 933    | y     | 0 |
| Q6GB45     | Clumping factor A                 | <i>Staphylococcus aureus</i> (strain MSSA476)            | 928    | y     | 0 |
| Q6GIK4     | Clumping factor A                 | <i>Staphylococcus aureus</i> (strain MRSA252)            | 1029   | y     | 0 |
| Q8NXJ1     | Clumping factor A                 | <i>Staphylococcus aureus</i> (strain MW2)                | 946    | y     | 0 |
| Q932C5     | Clumping factor A                 | <i>Staphylococcus aureus</i> (strain Mu50 / ATCC 700699) | 935    | y     | 0 |
| Q99VJ4     | Clumping factor A                 | <i>Staphylococcus aureus</i> (strain N315)               | 989    | y     | 0 |
| Q2FUY2     | Clumping factor B                 | <i>Staphylococcus aureus</i> (strain NCTC 8325 / PS 47)  | 877    | y     | 0 |
| Q5HCR7     | Clumping factor B                 | <i>Staphylococcus aureus</i> (strain COL)                | 913    | y     | 0 |

|            |                                              |                                                                  |      |   |   |
|------------|----------------------------------------------|------------------------------------------------------------------|------|---|---|
| Q6G644     | Clumping factor B                            | <i>Staphylococcus aureus</i><br>(strain MSSA476)                 | 905  | y | 0 |
| Q6GDH2     | Clumping factor B                            | <i>Staphylococcus aureus</i><br>(strain MRSA252)                 | 873  | y | 0 |
| Q8NUL0     | Clumping factor B                            | <i>Staphylococcus aureus</i><br>(strain MW2)                     | 907  | y | 0 |
| Q99R07     | Clumping factor B                            | <i>Staphylococcus aureus</i><br>(strain Mu50 / ATCC<br>700699)   | 877  | y | 0 |
| Q53654     | Collagen adhesin                             | <i>Staphylococcus aureus</i>                                     | 1183 | y | 3 |
| A7X6I5     | Fibronectin-binding protein A                | <i>Staphylococcus aureus</i><br>(strain Mu3 / ATCC<br>700698)    | 1038 | y | 0 |
| P14738     | Fibronectin-binding protein A                | <i>Staphylococcus aureus</i><br>(strain NCTC 8325 / PS<br>47)    | 1018 | y | 0 |
| Q2FE03     | Fibronectin-binding protein A                | <i>Staphylococcus aureus</i><br>(strain USA300)                  | 1018 | y | 0 |
| Q2YW62     | Fibronectin-binding protein A                | <i>Staphylococcus aureus</i><br>(strain bovine RF122 /<br>ET3-1) | 990  | y | 0 |
| Q6GDU5     | Fibronectin-binding protein A                | <i>Staphylococcus aureus</i><br>(strain MRSA252)                 | 965  | y | 0 |
| Q8NUU7     | Fibronectin-binding protein A                | <i>Staphylococcus aureus</i><br>(strain MW2)                     | 1015 | y | 0 |
| A0A0H2XKG3 | Fibronectin-binding protein B                | <i>Staphylococcus aureus</i><br>(strain USA300)                  | 940  | y | 0 |
| O86487     | Serine-aspartate repeat-containing protein C | <i>Staphylococcus aureus</i><br>(strain Newman)                  | 947  | y | 2 |
| Q2FJ79     | Serine-aspartate repeat-containing protein C | <i>Staphylococcus aureus</i><br>(strain USA300)                  | 947  | y | 2 |
| Q2G0L5     | Serine-aspartate repeat-containing protein C | <i>Staphylococcus aureus</i><br>(strain NCTC 8325 / PS<br>47)    | 995  | y | 2 |
| Q5HIB4     | Serine-aspartate repeat-containing protein C | <i>Staphylococcus aureus</i><br>(strain COL)                     | 947  | y | 2 |
| Q6GBS6     | Serine-aspartate repeat-containing protein C | <i>Staphylococcus aureus</i><br>(strain MSSA476)                 | 957  | y | 2 |
| Q6GJA7     | Serine-aspartate repeat-containing protein C | <i>Staphylococcus aureus</i><br>(strain MRSA252)                 | 906  | y | 2 |
| Q8NXX7     | Serine-aspartate repeat-containing protein C | <i>Staphylococcus aureus</i><br>(strain MW2)                     | 955  | y | 2 |
| Q99W48     | Serine-aspartate repeat-containing protein C | <i>Staphylococcus aureus</i><br>(strain Mu50 / ATCC<br>700699)   | 953  | y | 2 |
| O86488     | Serine-aspartate repeat-containing protein D | <i>Staphylococcus aureus</i><br>(strain Newman)                  | 1315 | y | 5 |
| Q2G0L4     | Serine-aspartate repeat-containing protein D | <i>Staphylococcus aureus</i><br>(strain NCTC 8325 / PS<br>47)    | 1349 | y | 5 |
| Q2FJ78     | Serine-aspartate repeat-containing protein D | <i>Staphylococcus aureus</i><br>(strain USA300)                  | 1381 | y | 5 |

|        |                                              |                                                                |      |   |   |
|--------|----------------------------------------------|----------------------------------------------------------------|------|---|---|
| Q6GBS5 | Serine-aspartate repeat-containing protein D | <i>Staphylococcus aureus</i><br>(strain MSSA476)               | 1365 | y | 5 |
| Q8NXX6 | Serine-aspartate repeat-containing protein D | <i>Staphylococcus aureus</i><br>(strain MW2)                   | 1347 | y | 5 |
| Q99W47 | Serine-aspartate repeat-containing protein D | <i>Staphylococcus aureus</i><br>(strain Mu50 / ATCC<br>700699) | 1385 | y | 5 |
| O86489 | Serine-aspartate repeat-containing protein E | <i>Staphylococcus aureus</i><br>(strain Newman)                | 1166 | y | 3 |
| Q2FJ77 | Serine-aspartate repeat-containing protein E | <i>Staphylococcus aureus</i><br>(strain USA300)                | 1154 | y | 3 |
| Q5HIB2 | Serine-aspartate repeat-containing protein E | <i>Staphylococcus aureus</i><br>(strain COL)                   | 1166 | y | 3 |
| Q6GBS4 | Serine-aspartate repeat-containing protein E | <i>Staphylococcus aureus</i><br>(strain MSSA476)               | 1141 | y | 3 |
| Q932F7 | Serine-aspartate repeat-containing protein E | <i>Staphylococcus aureus</i><br>(strain Mu50 / ATCC<br>700699) | 1141 | y | 3 |
| Q99W46 | Serine-aspartate repeat-containing protein E | <i>Staphylococcus aureus</i><br>(strain N315)                  | 1141 | y | 3 |

Table S2: *S. aureus* adhesins and the respective peptides complexes used on the AlphaFold Multimer predictions. Entries are organized by solving method; the ones marked as solved by Modeller were updated after obtention of low force profiles when using the predicted AlphaFold Multimer structures. The full-length sequences were obtained according to their Uniprot ID as described below and post-processed to contain only the N2-N3 domains as described at the Methods section below.

| Solving method          | Uniprot ID | Protein                                      | ligand              | Strain                   |
|-------------------------|------------|----------------------------------------------|---------------------|--------------------------|
| X-ray<br>(PDB ID:5CFA)  | Q14U76     | Bone sialoprotein-binding protein            | Fibrinogen alpha    | not informed             |
| X-ray<br>(PDB ID:2VR3)  | Q2G015     | Clumping factor A                            | Fibrinogen gamma    | strain NCTC 8325 / PS 47 |
| X-ray<br>(PDB ID: 5WTB) | Q932F7     | Serine-aspartate repeat-containing protein E | Complement factor H | Mu50 / ATCC 700699       |
| AlphaFold               | Q6GJA6     | Bone sialoprotein-binding protein            | Fibrinogen alpha    | MRSA252                  |
| AlphaFold               | Q932C5     | Clumping factor A                            | Fibrinogen gamma    | Mu50 / ATCC 700699       |
| AlphaFold               | Q5HHM8     | Clumping factor A                            | Fibrinogen gamma    | COL                      |
| AlphaFold               | Q6GIK4     | Clumping factor A                            | Fibrinogen gamma    | MRSA252                  |
| AlphaFold               | Q6GB45     | Clumping factor A                            | Fibrinogen gamma    | MSSA476                  |
| AlphaFold               | Q8NXJ1     | Clumping factor A                            | Fibrinogen gamma    | MW2                      |

|           |            |                                              |                     |                    |
|-----------|------------|----------------------------------------------|---------------------|--------------------|
| AlphaFold | Q99VJ4     | Clumping factor A                            | Fibrinogen gamma    | N315               |
| AlphaFold | Q8NUL0     | Clumping factor B                            | Fibrinogen alpha    | MW2                |
| AlphaFold | Q99R07     | Clumping factor B                            | Fibrinogen beta     | Mu50 / ATCC 700699 |
| AlphaFold | A0A0H2XKG3 | Fibronectin-binding protein B                | Fibrinogen beta     | USA300             |
| AlphaFold | Q6GJA7     | Serine-aspartate repeat-containing protein C | Fibrinogen alpha    | MRSA252            |
| AlphaFold | Q2FJ77     | Serine-aspartate repeat-containing protein E | Complement factor H | USA300             |
| AlphaFold | O86489     | Serine-aspartate repeat-containing protein E | Complement factor H | Newman             |
| AlphaFold | Q8NXX5     | Serine-aspartate repeat-containing protein E | Complement factor H | MW2                |
| AlphaFold | Q99W46     | Serine-aspartate repeat-containing protein E | Complement factor H | N315               |
| AlphaFold | Q5HIB2     | Serine-aspartate repeat-containing protein E | Complement factor H | COL                |
| AlphaFold | Q6GBS4     | Serine-aspartate repeat-containing protein E | Complement factor H | MSSA476            |
| Modeller  | Q2FUY2     | Clumping factor B                            | Fibrinogen alpha    | NCTC 8325 / PS 47  |
| Modeller  | Q2G0L5     | Serine-aspartate repeat-containing protein C | Fibrinogen alpha    | NCTC 8325 / PS 47  |
| Modeller  | Q99W48     | Serine-aspartate repeat-containing protein C | Complement factor H | Mu50 / ATCC 700699 |
| Modeller  | Q6GBS6     | Serine-aspartate repeat-containing protein C | Fibrinogen alpha    | MSSA476            |
| Modeller  | Q2FJ79     | Serine-aspartate repeat-containing protein C | Fibrinogen alpha    | USA300             |
| Modeller  | Q8NXX7     | Serine-aspartate repeat-containing protein C | Fibrinogen alpha    | MW2                |
| Modeller  | Q5HIB4     | Serine-aspartate repeat-containing protein C | Fibrinogen alpha    | COL                |
| Modeller  | O86487     | Serine-aspartate repeat-containing protein C | Fibrinogen alpha    | Newman             |

|          |        |                                              |                     |                    |
|----------|--------|----------------------------------------------|---------------------|--------------------|
| Modeller | Q2G0L4 | Serine-aspartate repeat-containing protein D | Fibrinogen alpha    | NCTC 8325 / PS 47  |
| Modeller | Q99W47 | Serine-aspartate repeat-containing protein D | Complement factor H | Mu50 / ATCC 700699 |

### 3 Methods

#### 3.1 Protein structure prediction and processing

We selected 54 *S. aureus* adhesins from the adhesion superfamily (InterPro: IPR008966) to have their full-length sequence (~1k residues) modelled. After eliminating redundancy, 42 sequences were retrieved from the Uniprot database according to the accession numbers described on Table S1. We used AlphaFold 2 (Jumper et al., 2021) through the VMD QwikFold plugin batch mode (Gomes et al., 2022) to construct the models for the full length apo proteins. Current implementation of AlphaFold 2 can generate up to 24 predictions for each sequence. All models were ranked by the predicted Local Distance Difference Test (pLDDT) quality scores.

From the same protein family, we selected 27 *S. aureus* adhesins to be modelled in complex with peptides from the human extracellular matrix (Table S2). The full-length sequences retrieved from Uniprot. Before structure prediction, the sequences were trimmed to contain only the N2 and N3 domains, necessary to dock and lock the peptides. To do that, all sequences were aligned using MAFFT (Nakamura et al., 2018). HMMER (Eddy, 2011) was used to generate a hidden-markov model profile using 3 *S. aureus* adhesins crystal structures that contained the Ig-like domains N2 and N3: bone sialoprotein binding protein, clumping factor B and serine-aspartate repeat-containing protein E (PDB IDs: 5CFA, 4F1Z, 5WTA, respectively). This profile was used to search against the aligned sequences and select the corresponding regions. Sequences for fibrinopeptides alfa, beta, gamma, in addition to complement factor H peptide were retrieved from available crystal structures for bone-sialoprotein binding protein (BBP), serine-aspartate repeat-containing protein G (SdrG from *S. epidermidis*), clumping factor A (ClfA) and serine-aspartate repeat-containing protein E (SdrE) (PDB IDs: 5CFA, 1R17, 2VR3, 5WTB, respectively). Proteins were later paired with each peptide based on information available on Uniprot. We used AlphaFold Multimer (Evans et al., 2022) through the QwikFold batch mode to construct the models. Five predictions were generated for each protein complex and ranked by the predicted interface template modelling (ipTM) scores, used by AlphaFold Multimer. The best ranked model for each complex was selected for steered molecular dynamics simulations.

Some adhesin:peptide complexes displayed very low force profiles upon SMD simulations. These were remodeled using Modeller (Eswar et al., 2008) using as templates BBP or SdrE crystal structures. Models were generated using standard parameters and the structures followed the same protocol described at the next session.

#### 3.2 Steered molecular dynamics (SMD) simulations

SMD simulations were conducted using NAMD 3 (Phillips et al., 2020). All systems were prepared using the VMD QwikMD interface (Humphrey et al., 1996; Ribeiro et al., 2016) where the proteins

were solvated with TIP3 water model (Jorgensen and Jenson, 1998) and the total charge neutralized using NaCl 0.15 mol/L ion concentration. The CHARMM36 (Best et al., 2012) force field was used to describe the system and the simulations were performed under periodic boundary conditions in the NpT ensemble with temperature maintained at 300 K using Langevin dynamics for temperature and pressure coupling, the latter kept at 1 bar. A distance cut-off of 11.0 Å was applied to short-range non-bonded interactions, whereas long-range electrostatic interactions were treated using the particle-mesh Ewald (PME) (Darden et al., 1993) method. Before the SMD simulations all the systems were submitted to an energy minimization protocol for 1,000 steps. Additionally, an MD simulation with position restraints in the protein backbone atoms was performed for 1 ns, with temperature ramping from 0k to 300 K in the first 0.5 ns, which served to pre-equilibrate the system. For SMD, adhesins were C-terminal anchored, while peptides were pulled at a constant speed of  $5 \times 10^{-5}$  Å/ps with a 5 kcal/mol/Å<sup>2</sup> spring constant for 10 ns. Production runs were generated in ten replicas for each complex. We also selected 3 *S. aureus* crystallographic structures of adhesin:peptide complexes: BBP, ClfA and SdrE (PDB IDs: 5CFA, 2VR3 and 5WTB) to be simulated as control. Root mean square deviation (RMSD) values were calculated for the equilibrium simulation pre-SMD, for all systems. Protein images were generated using VMD; plots were rendered using python scripts.

#### 4 References

- Best, R. B., Zhu, X., Shim, J., Lopes, P. E. M., Mittal, J., Feig, M., et al. (2012). Optimization of the additive CHARMM all-atom protein force field targeting improved sampling of the backbone  $\phi$ ,  $\psi$  and side-chain  $\chi_1$  and  $\chi_2$  Dihedral Angles. *Journal of Chemical Theory and Computation* 8, 3257–3273. doi: 10.1021/CT300400X.
- Darden, T., York, D., and Pedersen, L. (1993). Particle mesh Ewald: An N·log(N) method for Ewald sums in large systems. *The Journal of Chemical Physics* 98, 10089. doi: 10.1063/1.464397.
- Eddy, S. R. (2011). Accelerated Profile HMM Searches. *PLOS Computational Biology* 7, e1002195. doi: 10.1371/JOURNAL.PCBI.1002195.
- Eswar, N., Eramian, D., Webb, B., Shen, M.-Y., and Sali, A. (2008). Protein structure modeling with MODELLER. *Methods Mol Biol* 426, 145–59. doi: 10.1007/978-1-60327-058-8\_8.
- Evans, R., O’Neill, M., Pritzel, A., Antropova, N., Senior, A., Green, T., et al. (2022). Protein complex prediction with AlphaFold-Multimer. *bioRxiv*, 2021.10.04.463034. doi: 10.1101/2021.10.04.463034.
- Gomes, D. E. B., da Silva Figueiredo Celestino Gomes, P., and C Bernardi, R. (2022). QwikMD 2.0: bridging the gap between sequence, structure, and protein function. *Biophysical Journal* 121, 132a.
- Humphrey, W., Dalke, A., and Schulten, K. (1996). VMD: Visual molecular dynamics. *Journal of Molecular Graphics* 14, 33–38. doi: 10.1016/0263-7855(96)00018-5.

- Jorgensen, W. L., and Jenson, C. (1998). Temperature dependence of TIP3P, SPC, and TIP4P water from NPT Monte Carlo simulations: Seeking temperatures of maximum density. *Journal of Computational Chemistry* 19, 1179–1186. doi: 10.1002/(SICI)1096-987X(19980730)19:10<1179::AID-JCC6>3.0.CO;2-J.
- Jumper, J., Evans, R., Pritzel, A., Green, T., Figurnov, M., Ronneberger, O., et al. (2021). Highly accurate protein structure prediction with AlphaFold. *Nature* 2021 596:7873 596, 583–589. doi: 10.1038/s41586-021-03819-2.
- Nakamura, T., Yamada, K. D., Tomii, K., and Katoh, K. (2018). Parallelization of MAFFT for large-scale multiple sequence alignments. *Bioinformatics* 34, 2490–2492. doi: 10.1093/bioinformatics/bty121.
- Phillips, J. C., Hardy, D. J., Maia, J. D. C., Stone, J. E., Ribeiro, J. v., Bernardi, R. C., et al. (2020). Scalable molecular dynamics on CPU and GPU architectures with NAMD. *The Journal of Chemical Physics* 153, 044130. doi: 10.1063/5.0014475.
- Ribeiro, J. v., Bernardi, R. C., Rudack, T., Stone, J. E., Phillips, J. C., Freddolino, P. L., et al. (2016). QwikMD — Integrative Molecular Dynamics Toolkit for Novices and Experts. *Scientific Reports* 2016 6:1 6, 1–14. doi: 10.1038/srep26536.
